# Supplementary material for: Taï Forest Virus Does Not Cause Lethal Disease in Ferrets
Source: MDPI journal article supplement (doi:10.3390/microorganisms9020213), 2021-01-21
Supplement: s1 [file s1]

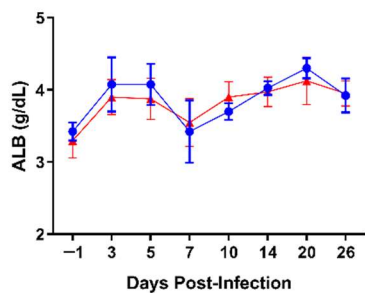

(a)

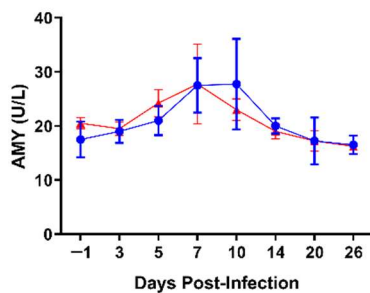

(b)

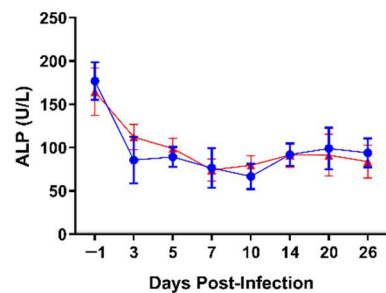

(c)

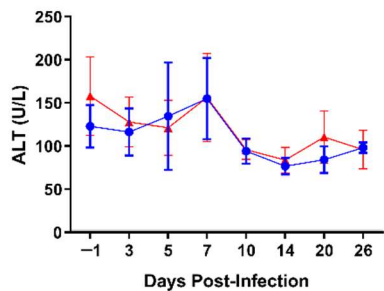

(d)

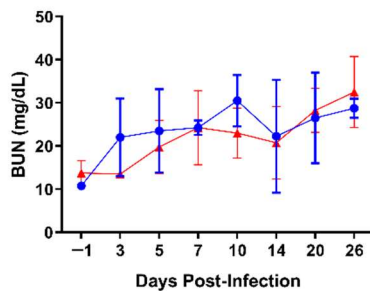

(e)

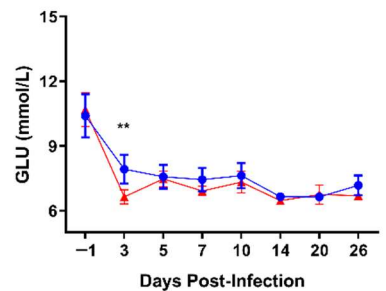

(f)

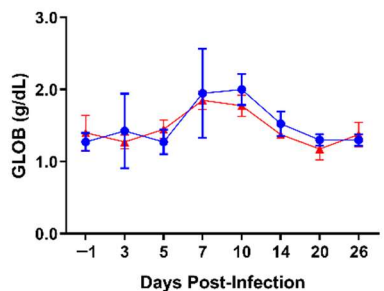

(g)

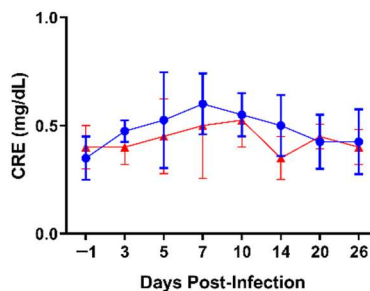

(h)

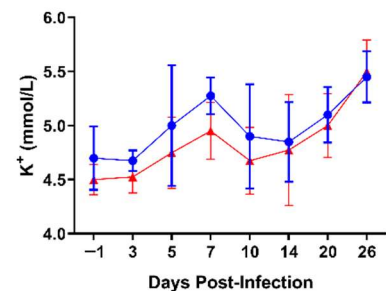

(i)

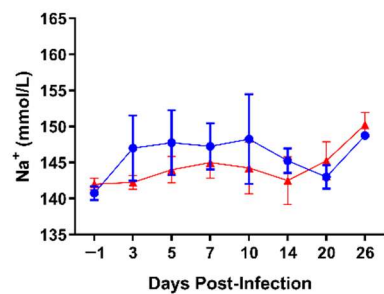

(j)

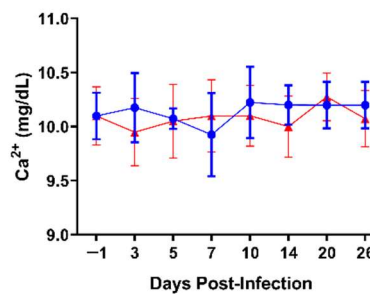

(k)

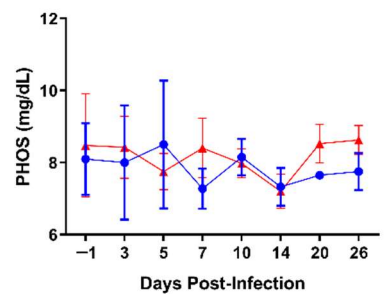

(l)

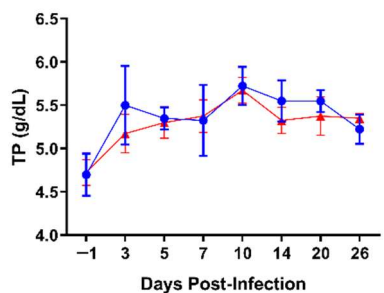

(m)

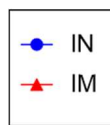

**Figure S1.** Average biochemical parameters of TAFV-infected ferrets. Whole blood was collected from each animal on days -1, 3, 5, 7, 10, 14, 20 and 26 post infection and the concentrations of the following parameters measured: (a) albumin (ALB); (b) amylase (AMY); (c) alkaline phosphatase (ALP); (d) alanine aminotransferase (ALT); (e) blood urea nitrogen (BUN); (f) blood glucose (GLU); (g) globulin (GLOB); (h) creatinine (CRE); (i) potassium ( $K^+$ ); (j) Sodium ( $Na^+$ ); (k) calcium ( $Ca^{2+}$ ); (l) phosphorus (PHOS); (m) total protein (TP). IM, intramuscular inoculation; IN, intranasal inoculation.

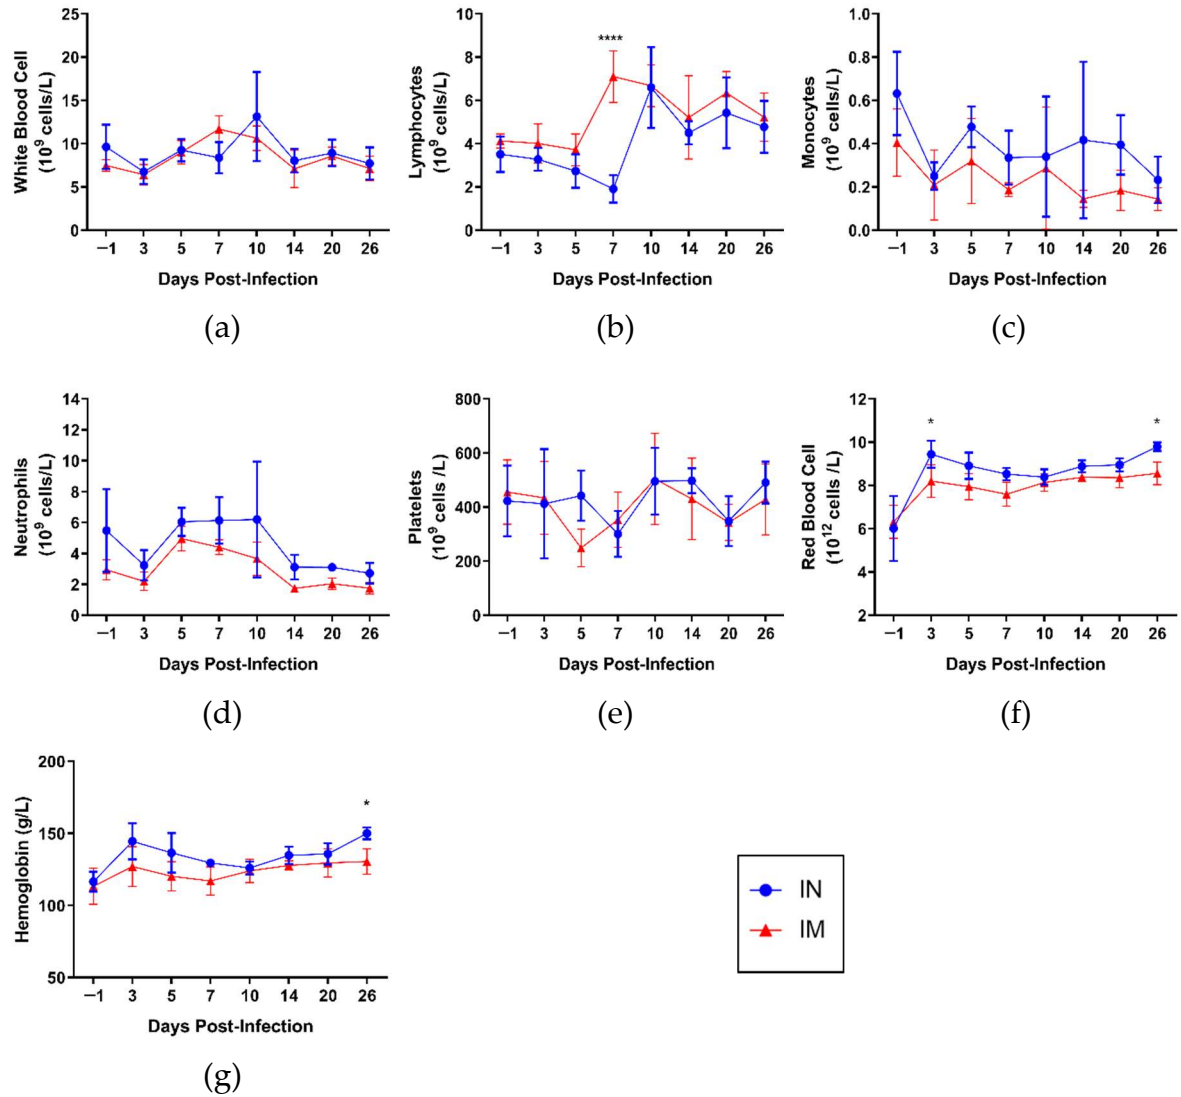

**Figure S2.** Average complete blood counts of TAFV-infected ferrets. Whole blood was collected from each animal on days -1, 3, 5, 7, 10, 14, 20 and 26 post infection and the concentrations of the following parameters measured: (a) white blood cells (WBC); (b) lymphocytes (LYM); (c) monocytes (MON); (d) neutrophils (NEU); (e) platelets (PLT); (f) red blood cells (RBC) and (g) hemoglobin (HB). IM, intramuscular inoculation; IN, intranasal inoculation.

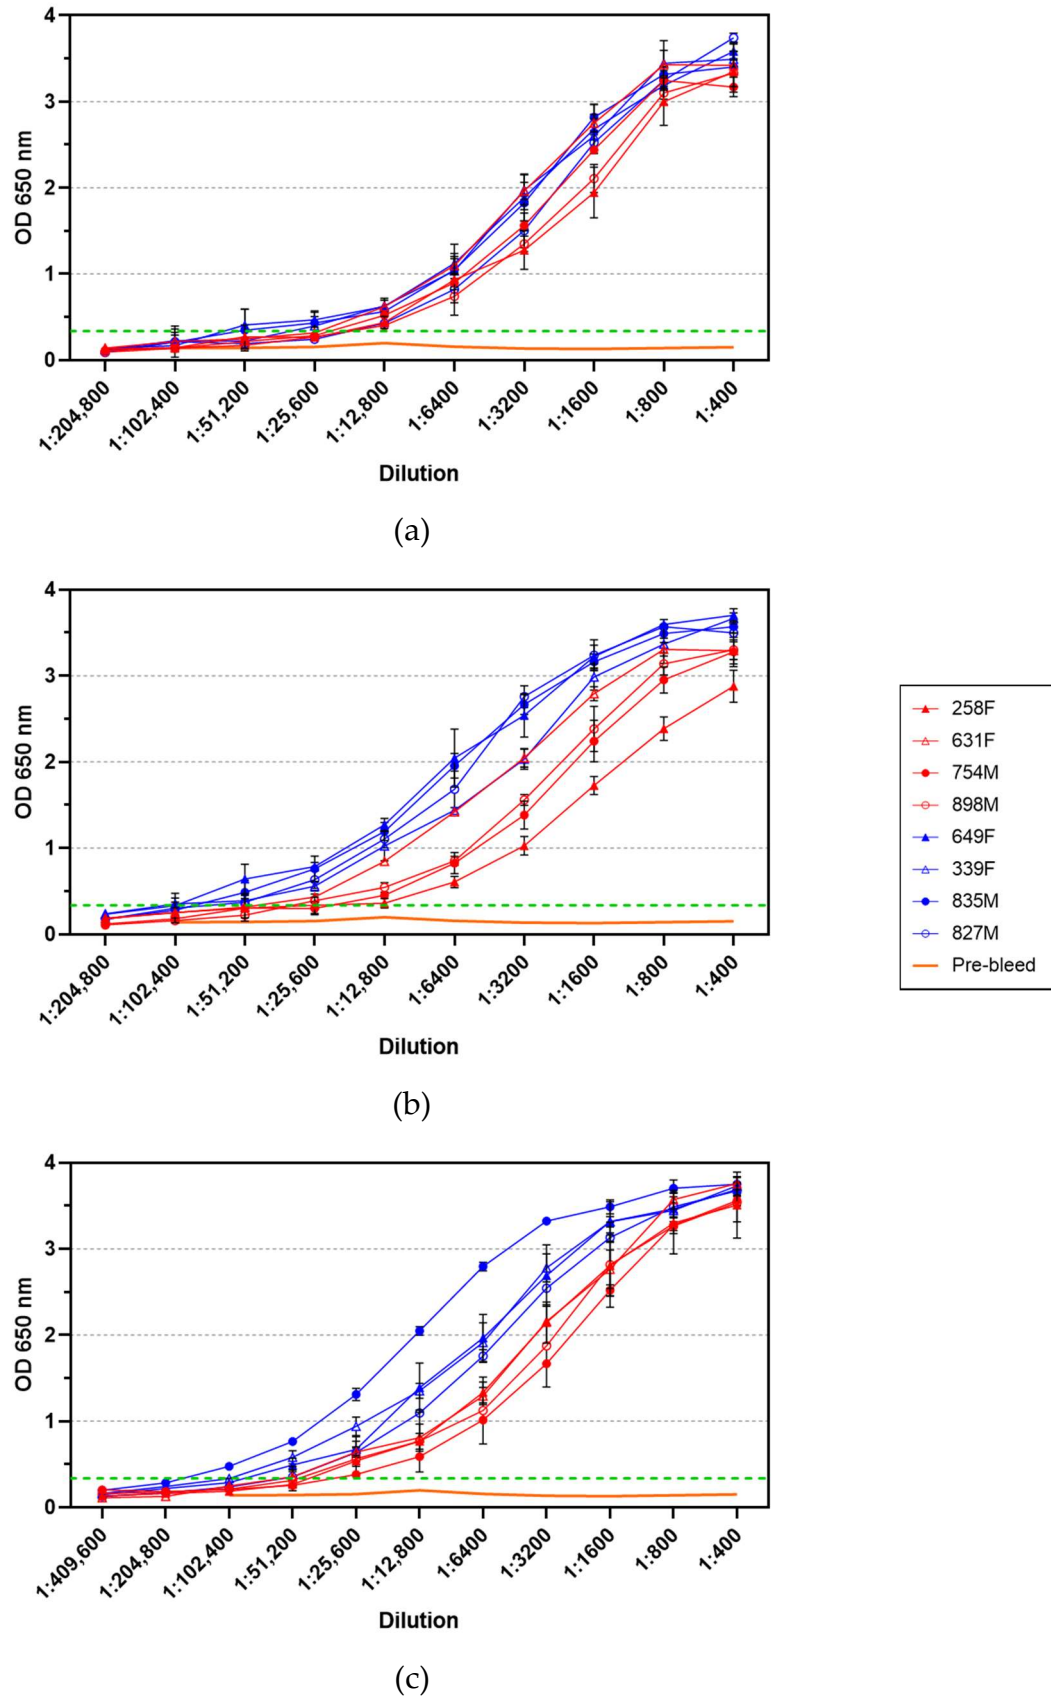

**Figure S3.** Detection of TAFV GP-specific IgG by ELISA. Serum samples collected from each animal on 14 (a), 20 (b) and 26 dpi (c) were subjected to ELISA to quantify circulating TAFV GP-specific IgG, indicated by fluorescence optical density (OD). The average of all pre-bleed (-1 dpi) samples is depicted by the orange line, and the positive cut-off is denoted by the green dotted line.

**Table S1.** RT-qPCR primer/probe sequences used for the detection of TAFV RNA

| Target     | Forward Primer (5'-3')         | Reverse Primer (5'-3')         | Probe                                          |
|------------|--------------------------------|--------------------------------|------------------------------------------------|
| TAFV<br>L  | CGTCA TCGCA TTGTT<br>GCAA      | CACTC GACTG TGGGC<br>TTCTG     | 6FAM-ATGAG TCCTC CCACG<br>ATCAT GTTTG TGC-BHQ1 |
| TAFV<br>NP | ACCAG CACCT<br>GTTTA TCGGA GTA | ACTCA CTTGG TTTGG<br>TTGCT TCT | 6FAM-AGAAA AGGAG<br>CCCCT CCCCCG CAAG-BHQ1     |

**Table S2.** Endpoint Titers of TAFV GP-specific IgG

| Route                 | Animal ID | Day Post-Infection |           |           |
|-----------------------|-----------|--------------------|-----------|-----------|
|                       |           | 14                 | 20        | 26        |
| Intramuscular<br>(IM) | 258F      | 1:12,800           | 1:25,600  | 1:25,600  |
|                       | 631F      | 1:12,800           | 1:25,600  | 1:51,200  |
|                       | 754M      | 1:12,800           | 1:12,800  | 1:25,600  |
|                       | 898M      | 1:12,800           | 1:25,600  | 1:12,800  |
| Intranasal<br>(IN)    | 649F      | 1:51,200           | 1:51,200  | 1:51,200  |
|                       | 339F      | 1:25,600           | 1:102,400 | 1:51,200  |
|                       | 835M      | 1:51,200           | 1:51,200  | 1:102,400 |
|                       | 827M      | 1:12,800           | 1:51,200  | 1:51,200  |

Values reported represent the lowest reciprocal dilution above the cut-off
